# Supplementary material for: Integrating multiple ‘omics’ analyses identifies serological protein biomarkers for preeclampsia
Source: PubMed Central journal article supplement (PMC4226208; doi:10.1186/1741-7015-11-236), 2013-11-06
Supplement: 1741-7015-11-236-S1.pdf [file 1741-7015-11-236-S1.pdf]

**Supplementary Table 1.** Expression data sets used for multiplex meta analysis based PE marker discovery.

| <b>Dataset</b>                      | <b>Title</b>                                                                                       | <b>Tissue</b>   | <b>Cases</b> | <b>Controls</b> |
|-------------------------------------|----------------------------------------------------------------------------------------------------|-----------------|--------------|-----------------|
| Nishizawa et al<br>Placenta 2007    | Differentially Expressed Genes in Placental Tissue of Severe Preeclampsia                          | placenta        | 10           | 4               |
| Tsai et al<br>Placenta 2011         | Transcriptional Profiling of Human Placentas from Pregnancies Complicated by Preeclampsia          | placenta        | 23           | 37              |
| Nishizawa et al<br>2011             | Gene expression profiling for placentas from pre-eclamptic, unexplained FGR and normal pregnancies | placenta        | 8            | 8               |
| Winn et al<br>Endocrinology<br>2009 | Severe Preeclampsia-Related Changes in Gene Expression at the Maternal-Fetal Interface             | placenta        | 12           | 11              |
| Sitras et al<br>Placenta 2009       | Placental gene expression in severe preeclampsia                                                   | placenta        | 17           | 26              |
| Founds et al<br>Placenta 2009       | Chorionic villus sampling (CVS) microarray in preeclampsia                                         | CVS             | 4            | 8               |
| Roten et al<br>MolHumRep<br>2011    | Transcription profiling of human decidua basalis to identify pre-eclampsia susceptibility genes    | Decidua basalis | 37           | 58              |
| <b>Total</b>                        |                                                                                                    |                 | 111          | 152             |

## Supplementary Table 2. Comparison of biomarker's abundances at early and late gestational age time points

| Analyte           | Control  |                  | PE       |                  |
|-------------------|----------|------------------|----------|------------------|
|                   | Fold*    | <i>p</i> value** | Fold*    | <i>p</i> value** |
| <b>PIGF</b>       | 0.449787 | 0.020445         | 1.754707 | 0.021946         |
| <b>sFlt-1</b>     | 1.823071 | 0.002984         | 0.773039 | 0.017316         |
| <b>HPX</b>        | 0.908643 | 0.509422         | 0.852538 | 0.433073         |
| <b>ADAM12</b>     | 1.204841 | 0.034792         | 1.462044 | 0.776988         |
| <b>APO C-III</b>  | 0.882512 | 0.445036         | 1.204613 | 1                |
| <b>HP</b>         | 1.019037 | 0.780443         | 1.018754 | 0.940656         |
| <b>A2M</b>        | 1.353563 | 0.079568         | 1.019117 | 0.852335         |
| <b>APO-E</b>      | 1.036976 | 0.668931         | 0.694897 | 0.820737         |
| <b>APO A-I</b>    | 0.80941  | 0.146736         | 1.164625 | 0.911083         |
| <b>RBP4</b>       | 1.400028 | 0.028797         | 0.917843 | 0.176456         |
| <b>pikachurin</b> | 0.832876 | 0.047833         | 1.070773 | 0.501947         |

\*Fold was calculated by the ratio of the medians of early and late gestational age samples' assayed biomarker abundances

\*\* *p* value: Mann-Whitney U test
